# Supplementary material for: Molecular profiling stratifies diverse phenotypes of treatment-refractory metastatic castration-resistant prostate cancer
Source: JCI journal article supplement (doi:10.1172/jci128212), 2019-07-30
Supplement: sd1 [file 1]

## **Supplementary Figures**

### **Molecular profiling stratifies diverse phenotypes of treatment-refractory metastatic castration-resistant prostate cancer**

Mark P. Labrecque, Ilsa M. Coleman, Lisha G. Brown, Lawrence D. True, Lori Kollath, Bryce Lakely, Holly M. Nguyen, Yu C. Yang, Rui M. Gil da Costa, Arja Kaipainen, Roger Coleman, Celestia S. Higano, Evan Y. Yu, Heather H. Cheng, Elahe A. Mostaghel, Bruce Montgomery, Michael T. Schweizer, Andrew C. Hsieh, Daniel W. Lin, Eva Corey, Peter S. Nelson, and Colm Morrissey

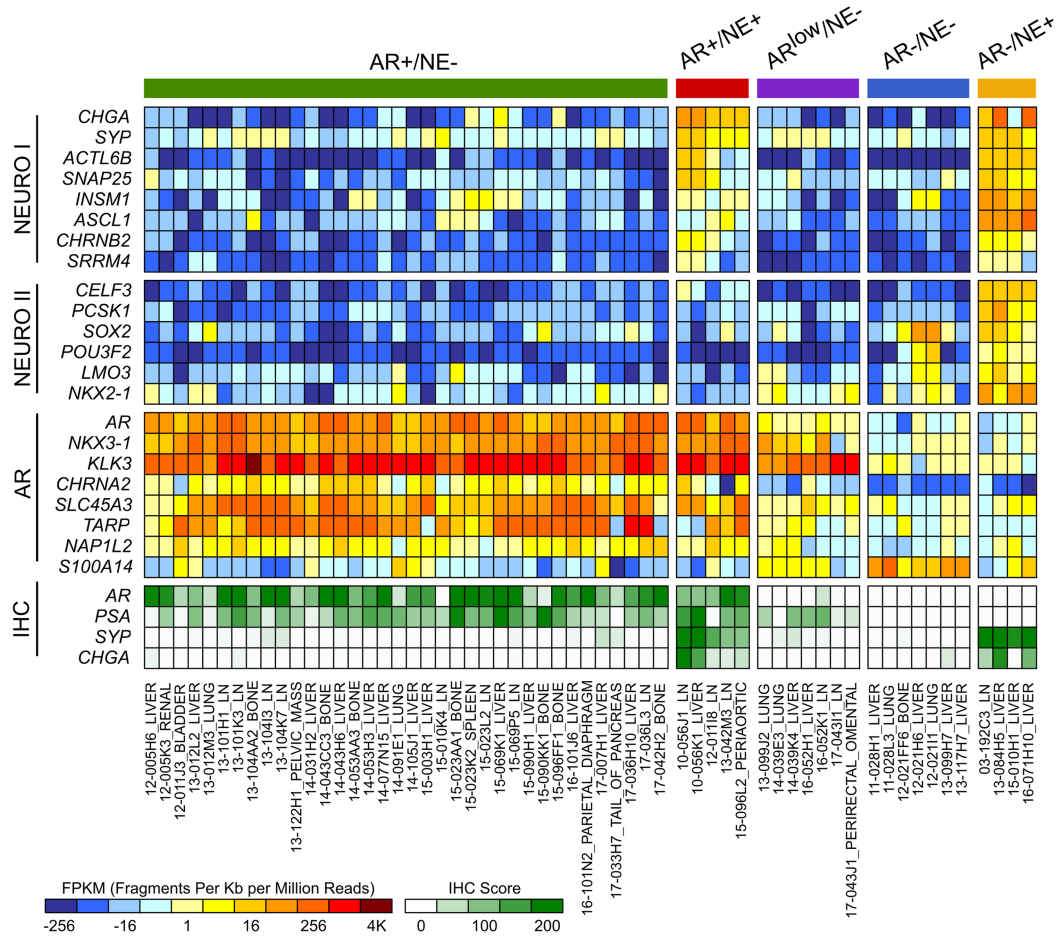

**Figure S1. mCRPC tumor phenotype classifications using RNA-Seq and IHC approaches.** RNA-Seq heatmap and corresponding IHC data of mCRPC specimens acquired through the rapid autopsy program from 2003-2017 (n=62; modified from Figure 1B). REST-repressed NE genes are listed in the NEURO I panel (top), NE-associated transcription factors are listed in the NEURO II panel (second from top) and AR and AR regulated genes are listed in the AR panel (second from bottom). The IHC analysis (bottom) was conducted on adjacent tumor tissue from the specimen used for RNA-Seq. Results are expressed as log<sub>2</sub> Fragments Per Kilobase of transcript per Million mapped reads (FPKM) or as IHC scores from 0-200 and colored according to scale.

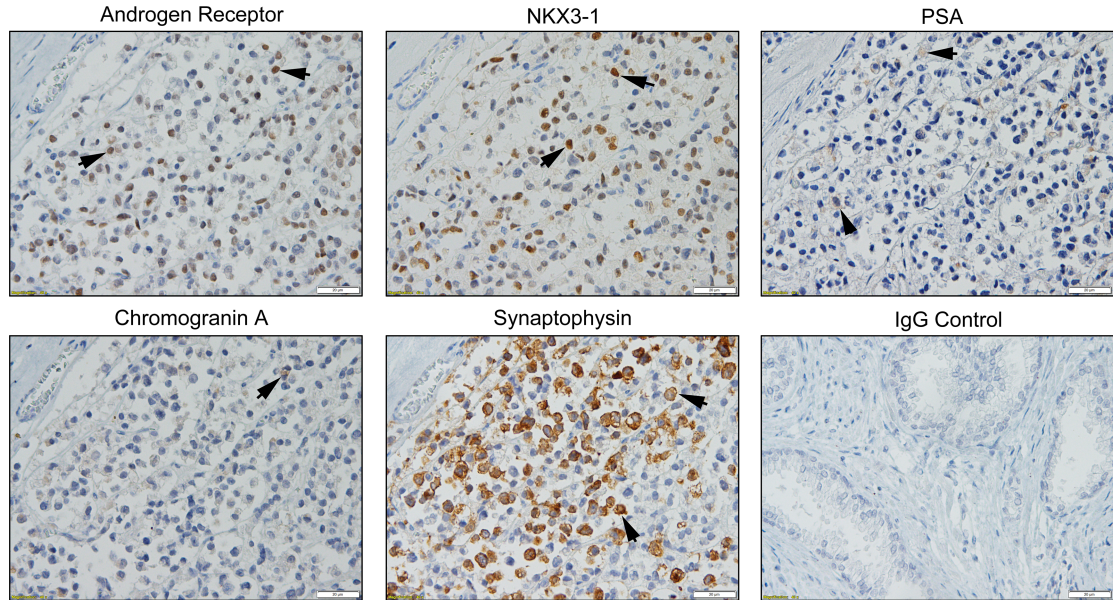

**Figure S2. Intratumoral heterogeneity.** Androgen receptor, NKX 3-1, PSA, chromogranin A, and synaptophysin expression were assessed in a single core from a lymph node metastasis from a prostate cancer rapid autopsy patient. IgG control was assessed in prostate. Arrows indicate positive staining cells. Bar = 20 microns.

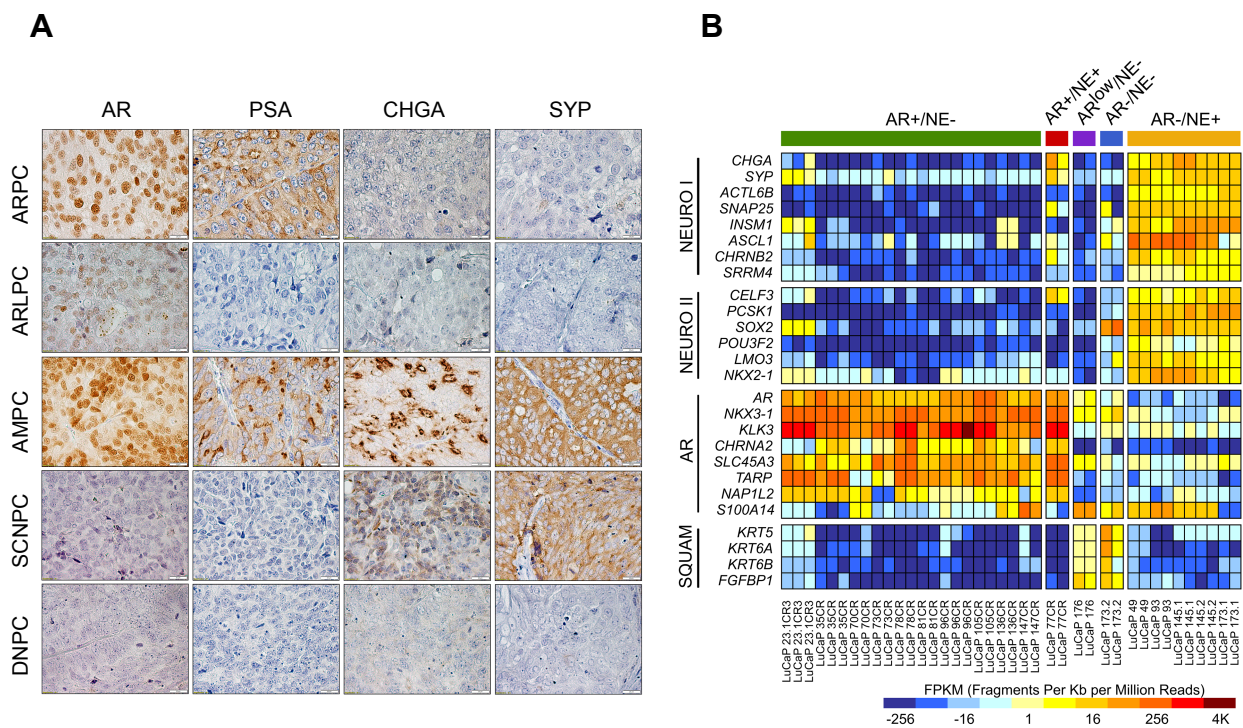

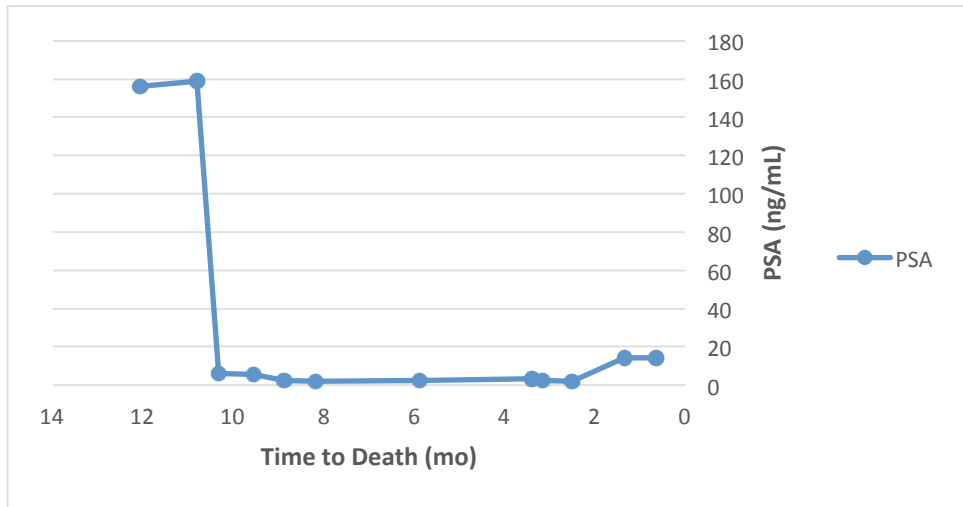

**Figure S4. PSA test results from patient 13-084 while on treatment.** Serum PSA levels from patient 13-084 were determined through a Hybritech Assay at the University of Washington Medical Center.

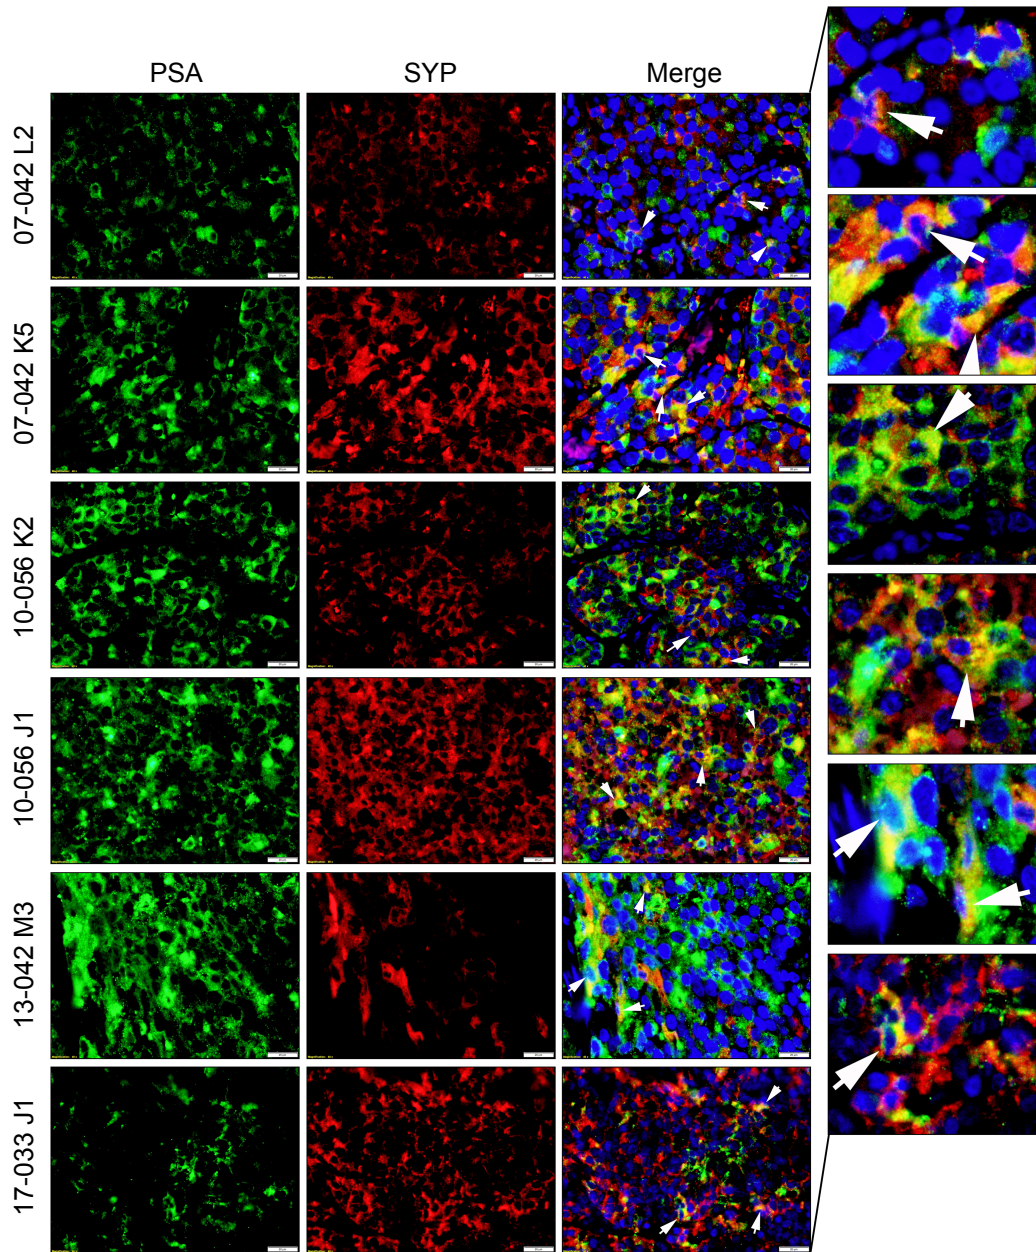

**Figure S5. PSA and SYP co-expression in patient samples.** Immunofluorescence of ampicrine/mixed patient tumor sections using primary antibodies directed to PSA (green) and SYP (red). Arrows (white) in the merge panels indicate tumor cells that co-express PSA and SYP (yellow to orange). Sections were counterstained with DAPI (blue) and correspond to the same tumor regions used for RNA Sequencing. Bar = 20 microns.

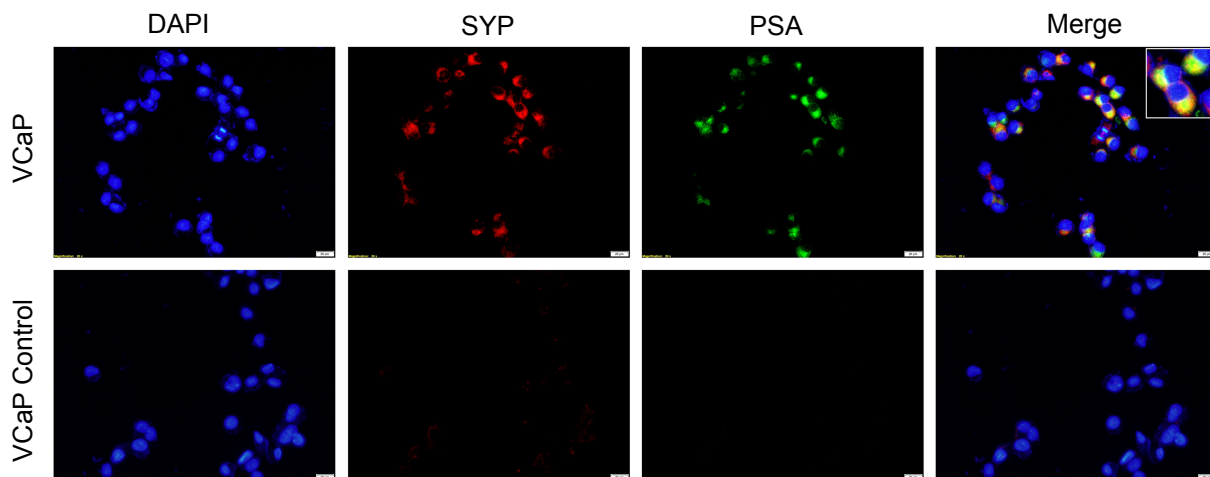

**Figure S6. VCaP cells are models of ampicrine PC.** Immunofluorescence of VCaP cells using primary antibodies directed to PSA (green) and SYP (red). Cells that co-express PSA and SYP (yellow to orange) are shown in the merge panels. Cells were counterstained with DAPI (blue) and control slides were stained with secondary antibody only (bottom panels). Bar = 20 microns.

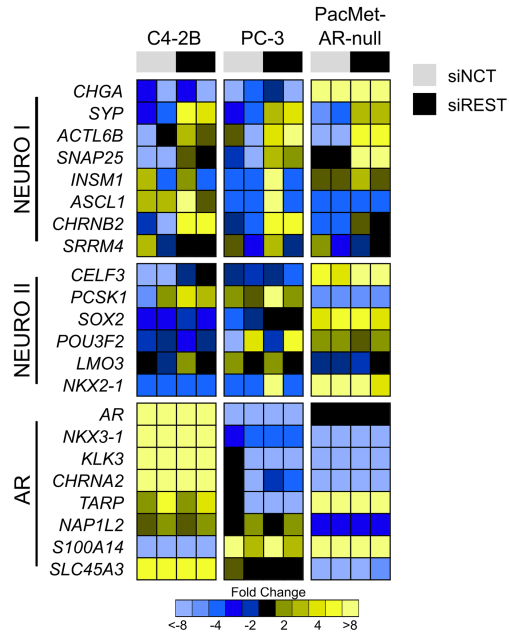

**Figure S7. REST knockdown upregulates NEURO I genes in cell lines.** RNA-Seq heatmap of C4-2B, PC-3 and PacMet AR-null cells transfected with siNCT or siREST illustrating NE associated genes (NEURO I and NEURO II) and AR and AR regulated genes. Log2 mean-centered ratios of genes are colored according to scale.



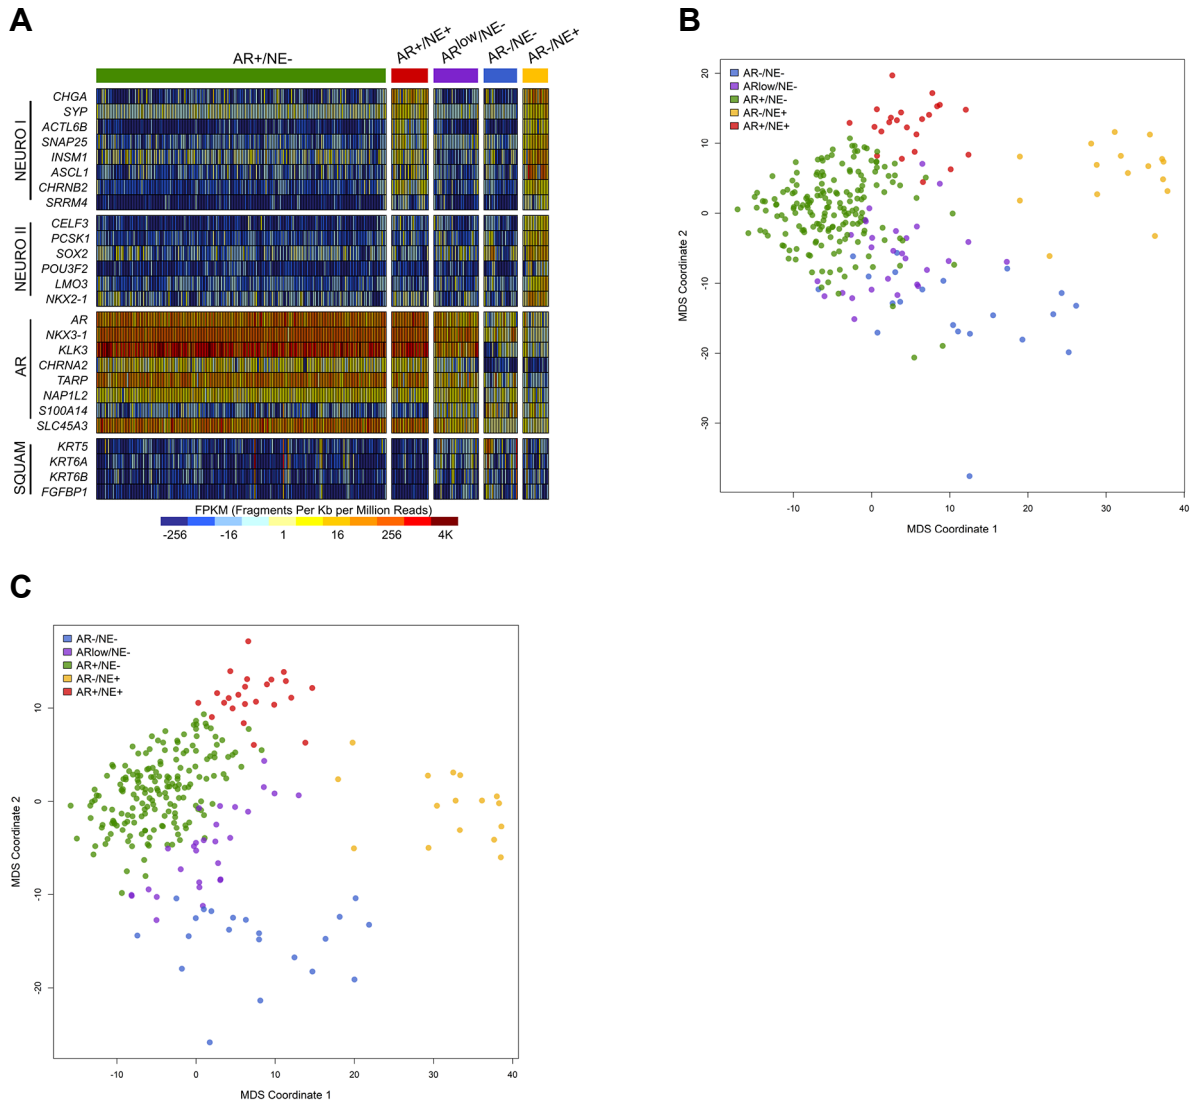

**Figure S8. The 26-gene transcriptional signature discriminates the five mCRPC phenotypes in the SU2C cohort. (A)** RNA sequencing heatmap and **(B)** MDS and cluster analysis of mCRPC specimens from the SU2C cohort (n=270) using the proposed 26-gene transcriptional signature. **(C)** MDS and cluster analysis of mCRPC specimens from the SU2C cohort (n=270) using a 22-gene transcriptional signature that excludes the SQUAM associated genes (*KRT5*, *KRT6A*, *KRT6B* and *FGFBP1*). The analysis was conducted on the PolyA RNA-Seq landscapes. ARPC (AR+/NE-; green), ARLPC (AR<sup>low</sup>/NE-; purple), DNPC (AR-/NE-; blue), AMPC/mixed (AR+/NE+; red), SCNPC (AR-/NE+; yellow).

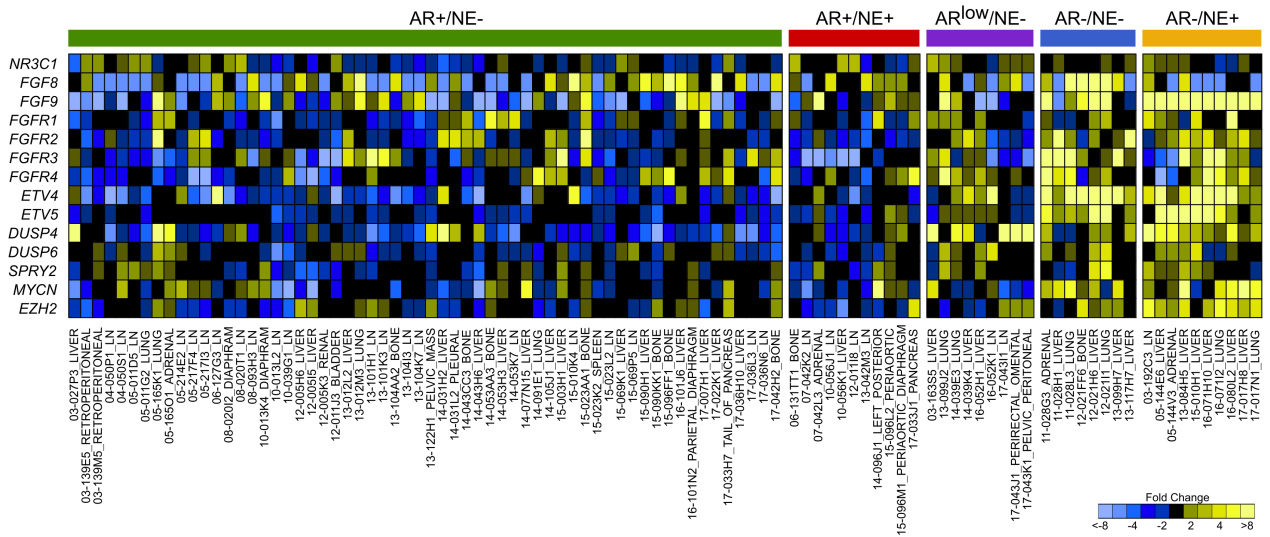

**Figure S9. Gene expression profiles of factors that identify mCRPC phenotypes.** RNA-Seq heatmap of mCRPC specimens acquired through the rapid autopsy program from 2003-2017 (n=98). Results are expressed as mean centered values and colored according scale. ARPC (AR-high PC; AR+/NE-), ARLPC (AR-low PC; AR<sup>low</sup>/NE-), AMPC (amphicrine PC; AR+/NE+), DNPC (double-negative PC; AR-/NE-) and SCNPC (small cell or neuroendocrine PC; AR-/NE+).

**Supplementary Table S1.** Antibodies used for immunohistochemistry (IHC) and immunoblot (IB)

---

| <b>Protein</b>                       | <b>Company</b> | <b>Product #</b> | <b>Dilution</b>          |
|--------------------------------------|----------------|------------------|--------------------------|
| anti-Androgen Receptor               | Biogenex       | MU256-UC         | IHC (1:60), IB (1/1000)  |
| anti-Prostate-specific Antigen       | Dako           | A0562            | 1:1000                   |
| anti-Chromogranin A                  | Dako           | M0869            | 1:100                    |
| anti-Synaptophysin                   | Santa Cruz     | sc-17750         | IHC (1:200), IB (1/2000) |
| anti-Cytokeratin 6                   | Abcam          | ab18586          | 1:10                     |
| anti-REST                            | LS Bio         | LS-B15559        | 1:5000                   |
| anti- $\beta$ -actin                 | SIGMA          | A2228            | 1:5000                   |
| goat anti-rabbit IgG-HRP             | Cell Signaling | 7074             | 1:5000                   |
| goat anti-mouse IgG-HRP              | Cell Signaling | 7076             | 1:5000                   |
| goat anti-rabbit IgG- AlexaFluor 488 | Invitrogen     | A11008           | 1:400                    |
| goat anti-mouse IgG- AlexaFluor 568  | Abcam          | ab175701         | 1:400                    |

---

**Supplementary Table S2. Patient demographics**

|                                                              |                    |
|--------------------------------------------------------------|--------------------|
| <b>Patient Characteristics</b>                               |                    |
| No. pts.                                                     | 55                 |
| Median age at diagnosis in years (SD)                        | 64 (8.3)           |
| Median age at death in years (SD)                            | 70 (9.2)           |
| Median survival after diagnosis in years (range)             | 8 (1-25)           |
| Median PSA at death in ng/mL (range)                         | 288.1 (0.2-5690.8) |
| Gleason (range)                                              | 6-10               |
| <b>Bone Metastases/Therapies</b>                             |                    |
| No. pts. with clinically detected bone metastases            | 53                 |
| Median survival after first bone metastases in years (range) | 1.8 (0.2-9.2)      |
| No pts. receiving bisphosphonate (%)                         | 32 (58%)           |
| Median treatment duration in years (range)                   | 1.2 (0.1-9.1)      |
| <b>Androgen Ablation Therapy</b>                             |                    |
| No. pts. receiving androgen ablation (%)                     | 54 (98%)           |
| Median treatment duration in years (range)                   | 4.2 (0.3-15.1)     |
| No. pts receiving ABI, ENZ or Both                           | 8, 4, 17           |
| <b>Other Therapies</b>                                       |                    |
| Ketoconazole (%)                                             | 17 (31%)           |
| DES (%)                                                      | 13 (24%)           |
| Corticosteroids (%)                                          | 42 (76%)           |
| Estramustine (%)                                             | 3 (5%)             |
| Taxotere (%)                                                 | 44 (80%)           |

Selected clinical data and treatment information for rapid autopsy patients in the study. Pts – Patients.
